# Supplementary material for: Dynamic temperature-sensitive A-to-I RNA editing in the brain of a heterothermic mammal during hibernation
Source: PubMed Central journal article supplement — RNA. 2018 Nov;24(11):1481–95. doi: 10.1261/rna.066522.118 (PMC6191720; doi:10.1261/rna.066522.118), 2018-11

Supplemental Figure 1

**A**

Cerebrum Hypothalamus Medulla

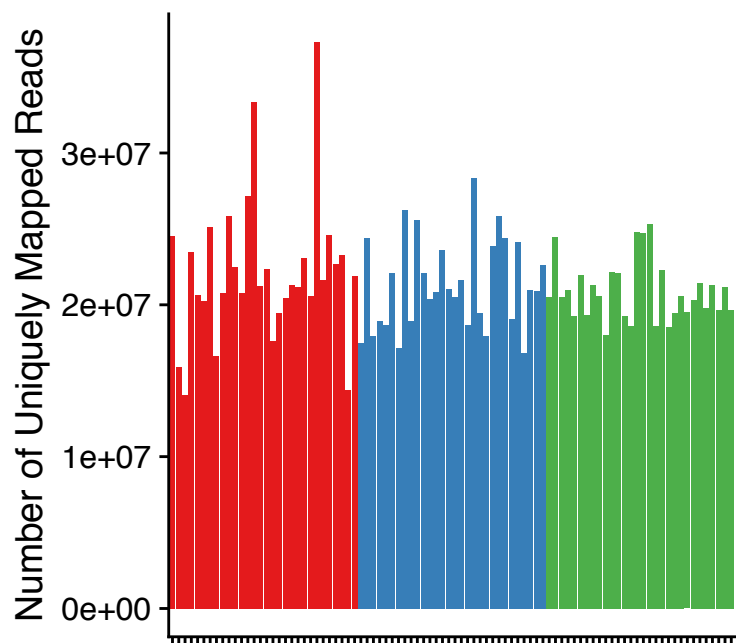

**B**

Cerebrum Hypothalamus Medulla

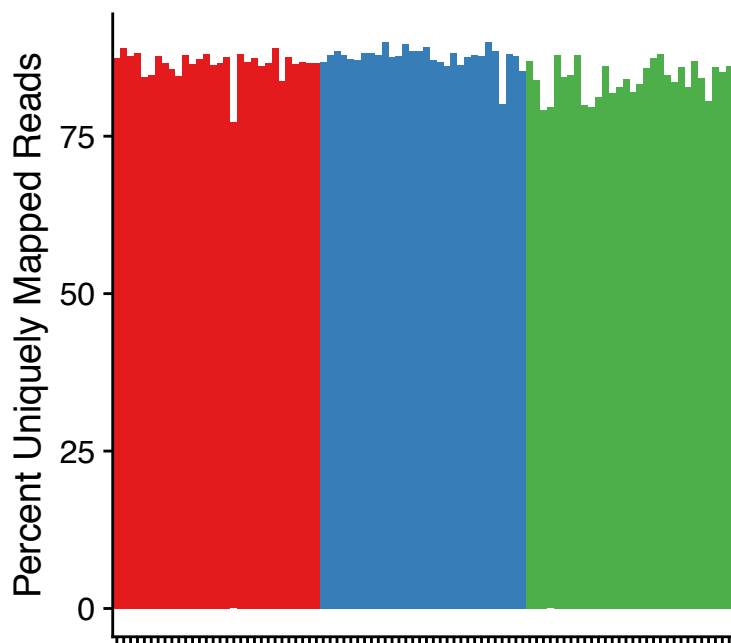

**C**

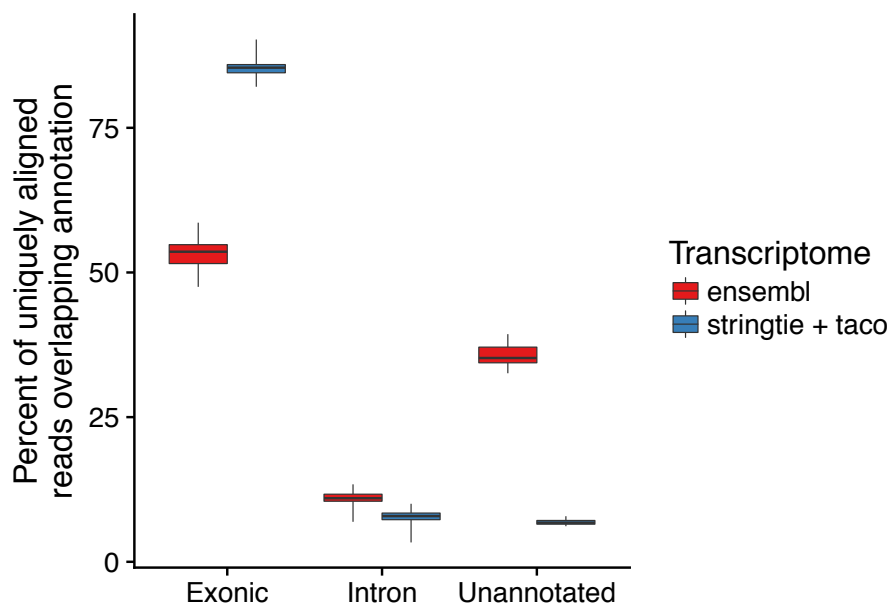

# Supplemental Figure 2

**A**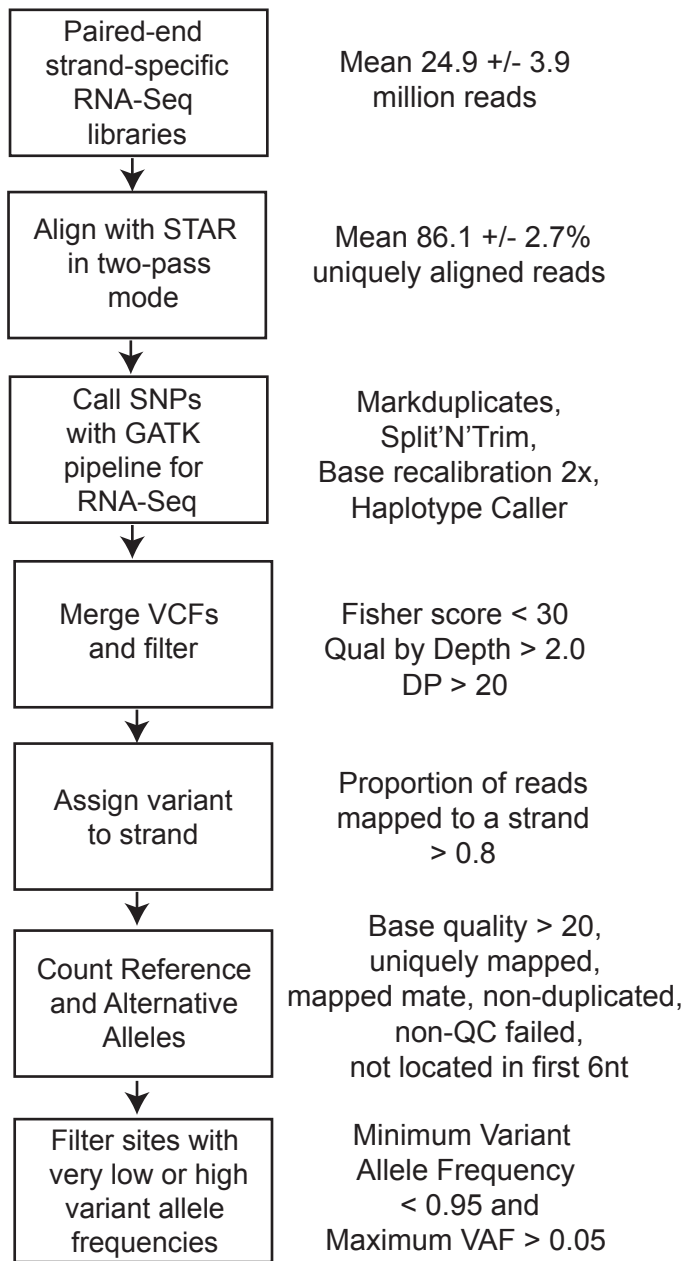**B**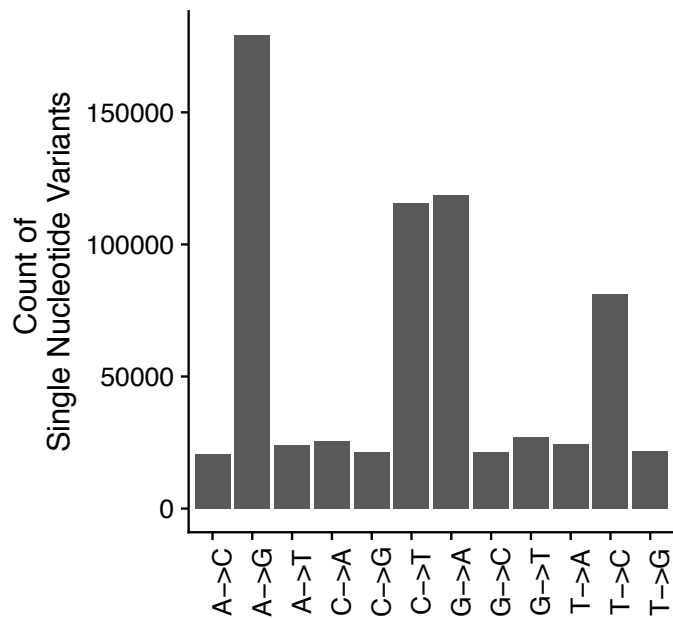**C**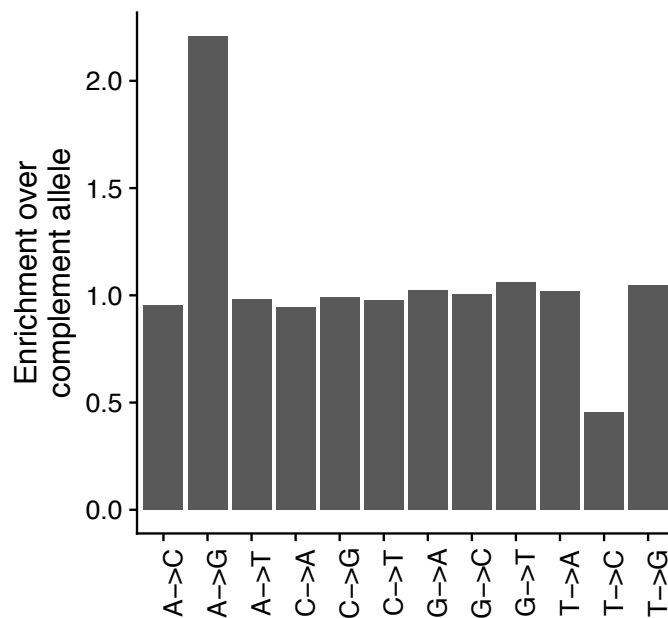

Supplemental Figure 3

State • SA • IBA • Ent • LT • Ar • SpD

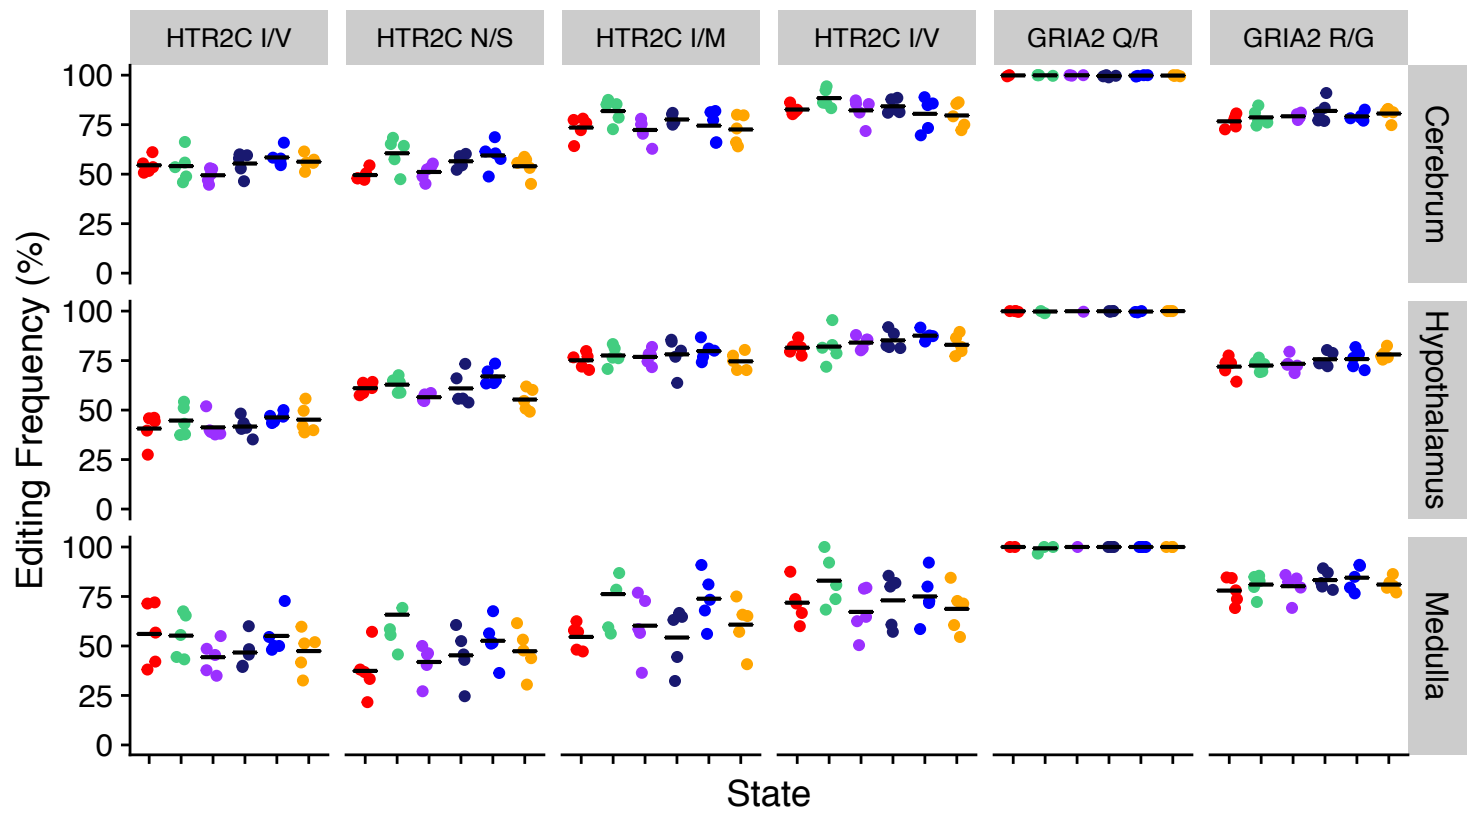

Supplemental Figure 4

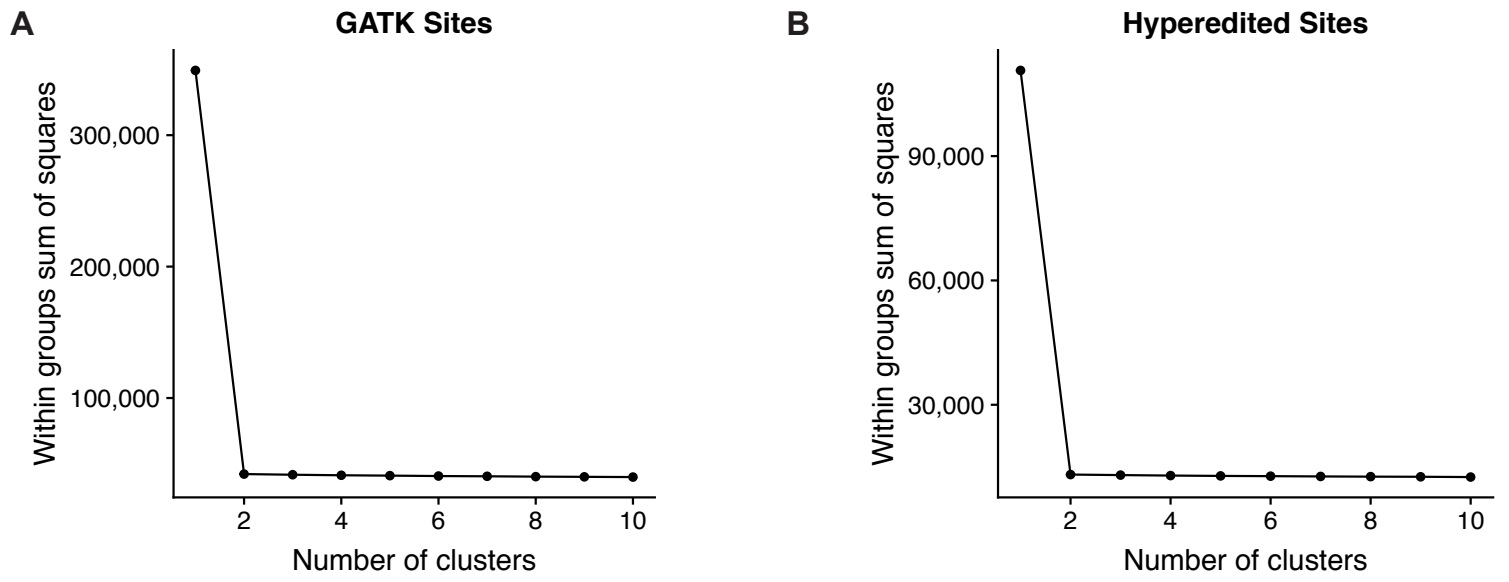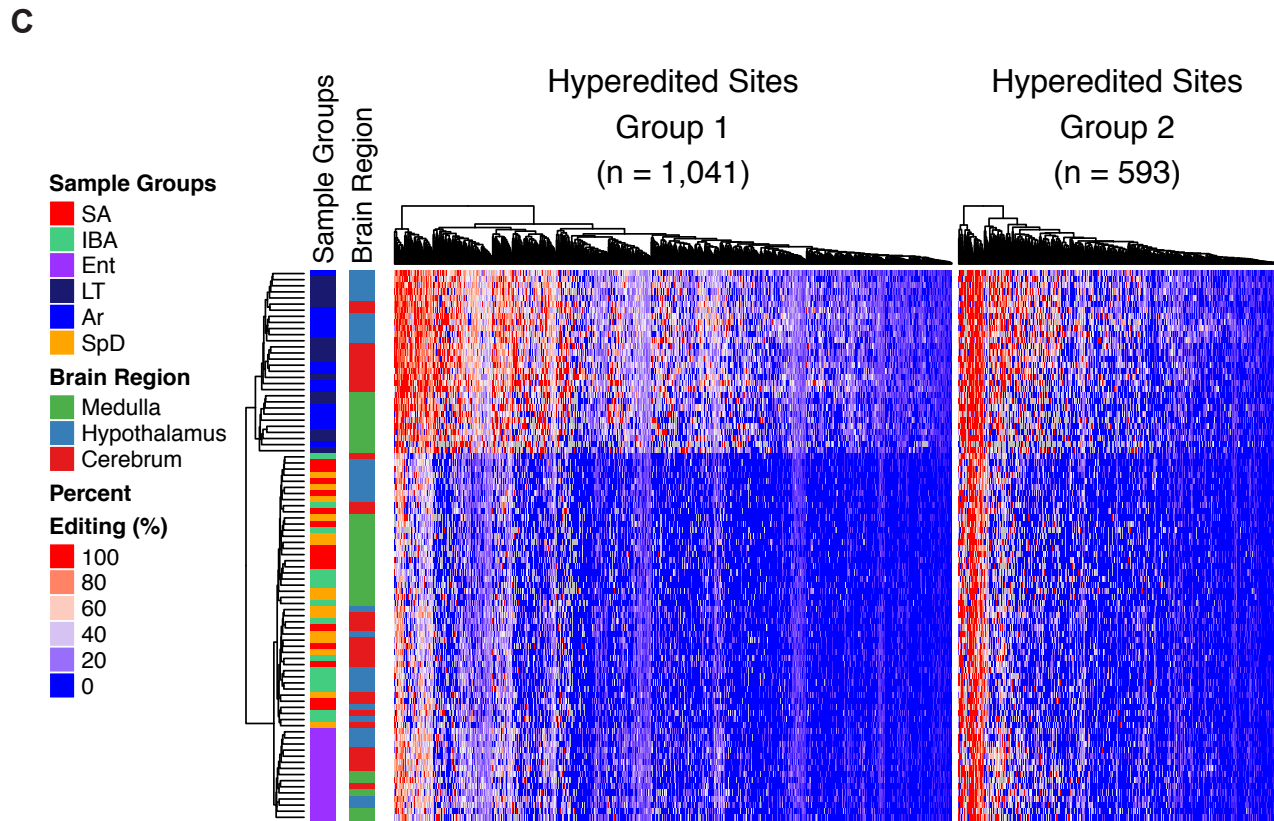



# Supplemental Figure 5

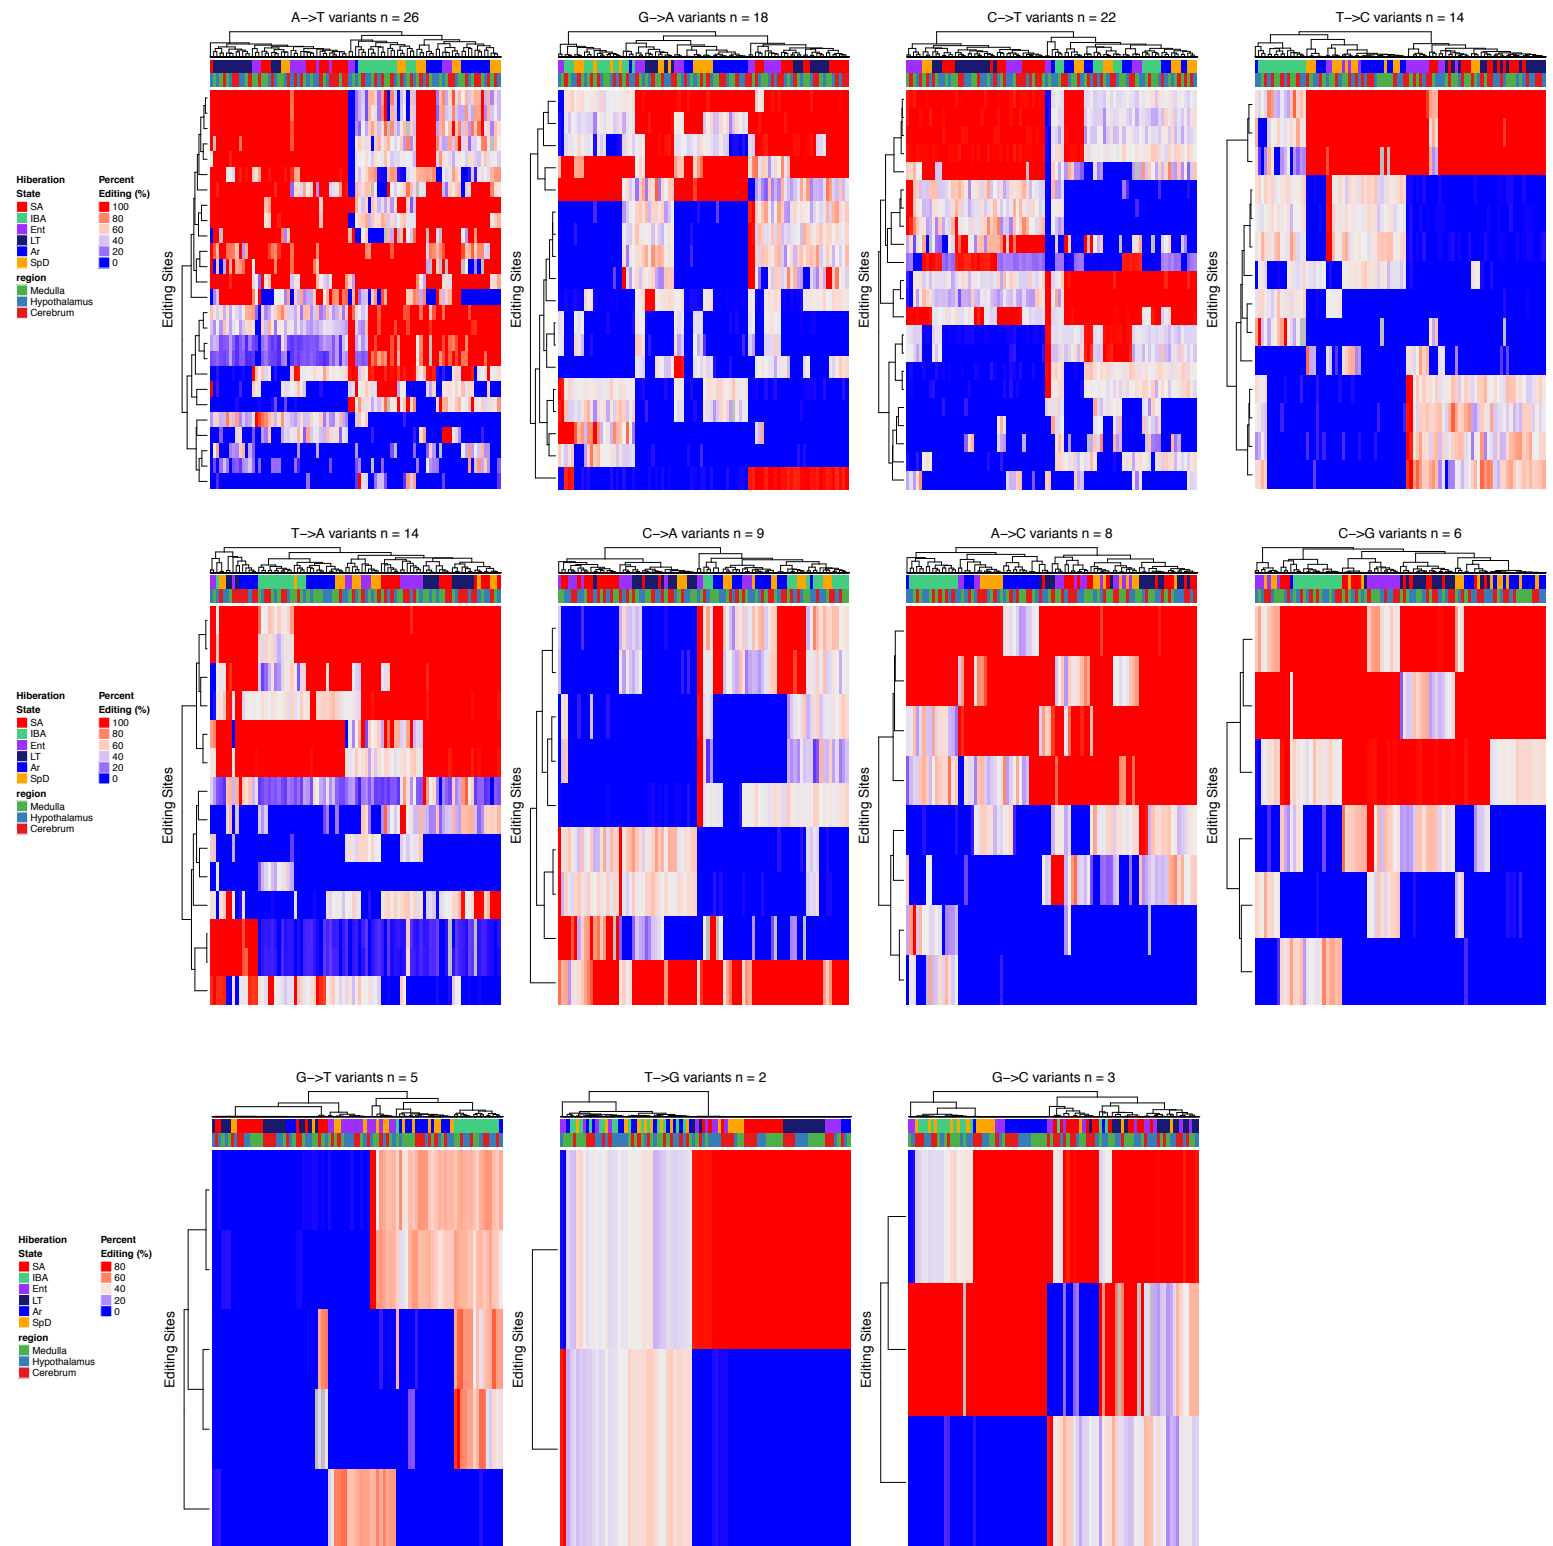

Supplemental Figure 6

A

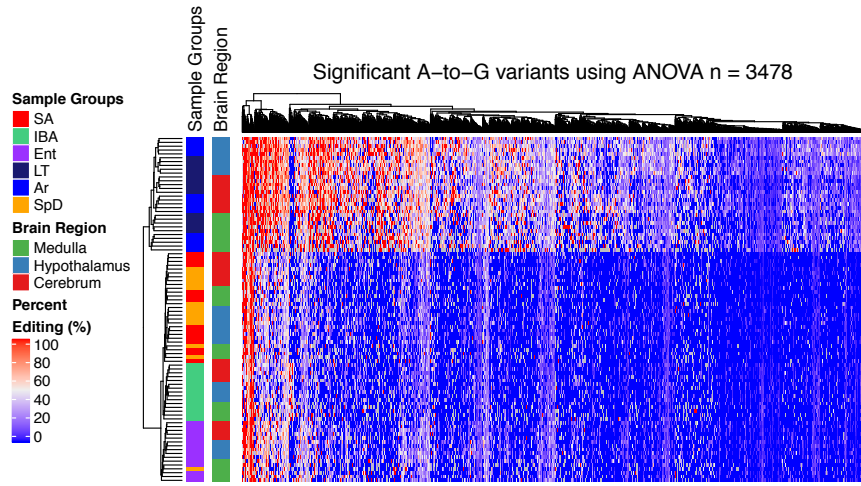

B

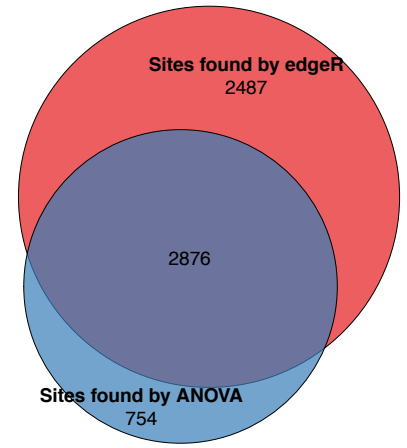

# Supplemental Figure 7

## A

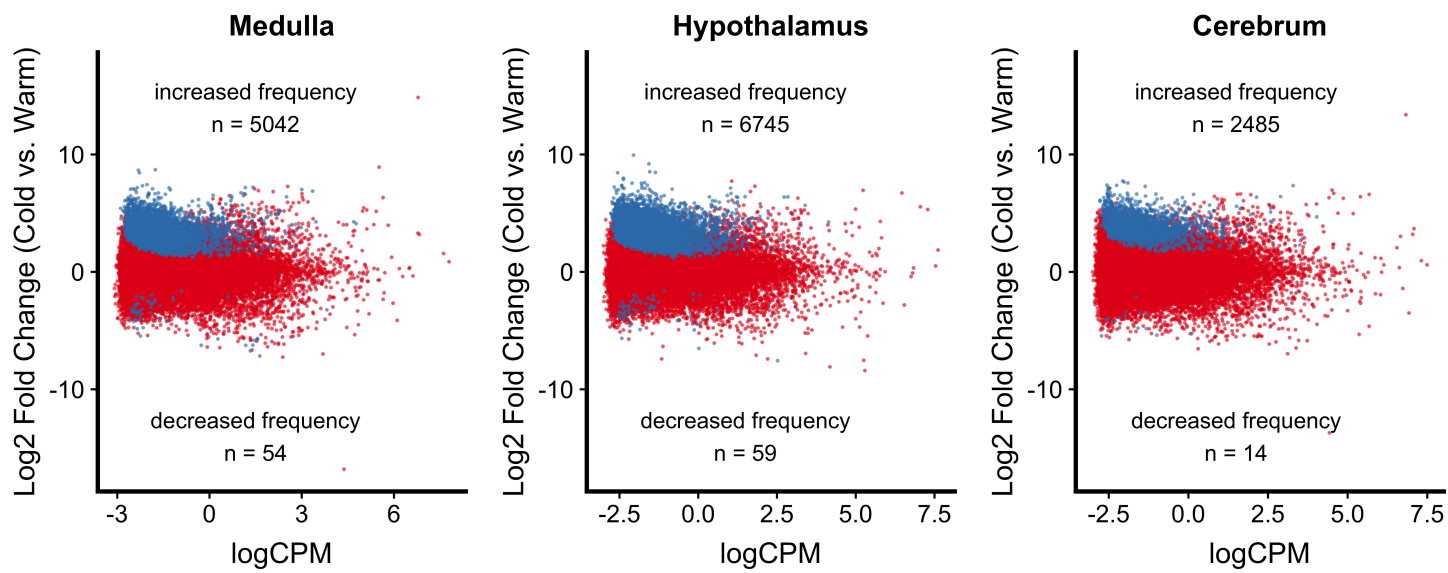

## B

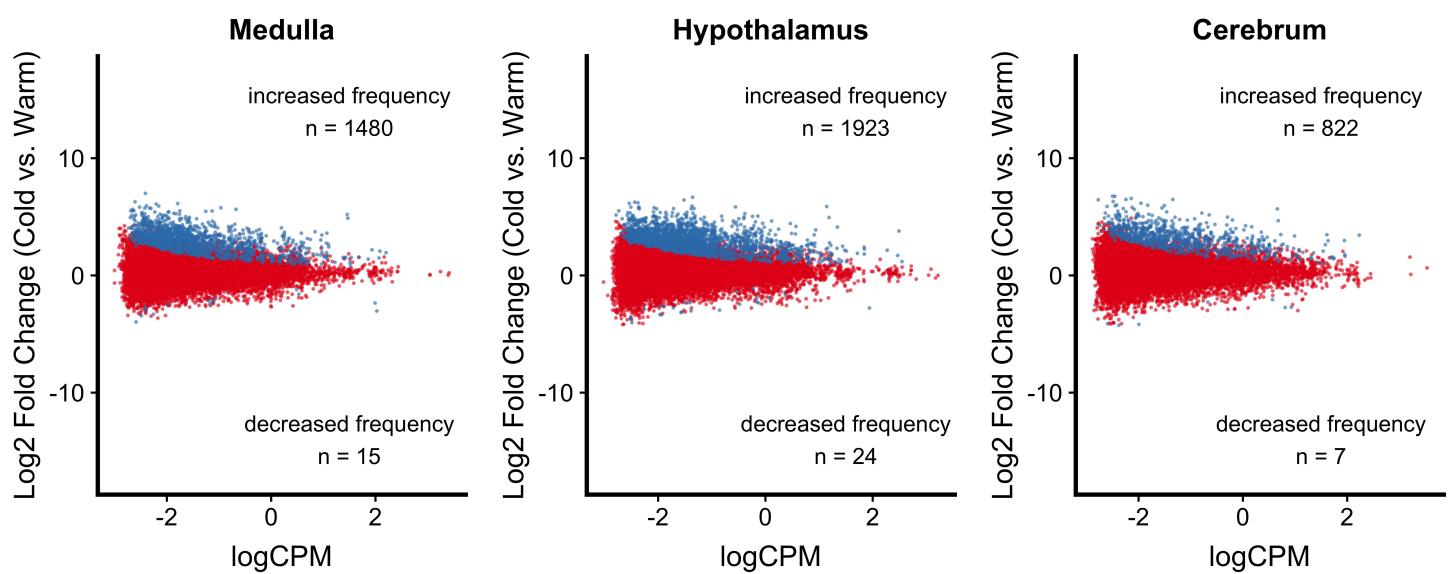

## Supplemental Figure 8

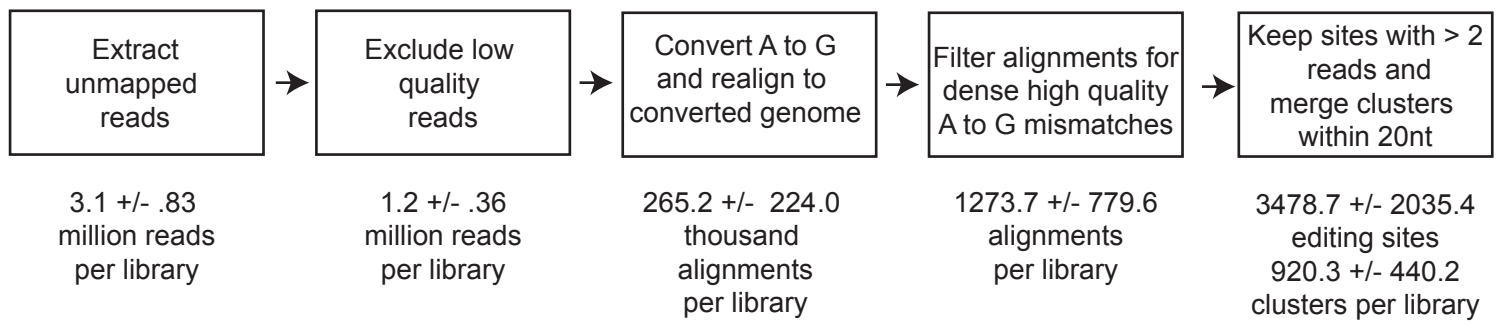

Supplemental Figure 9

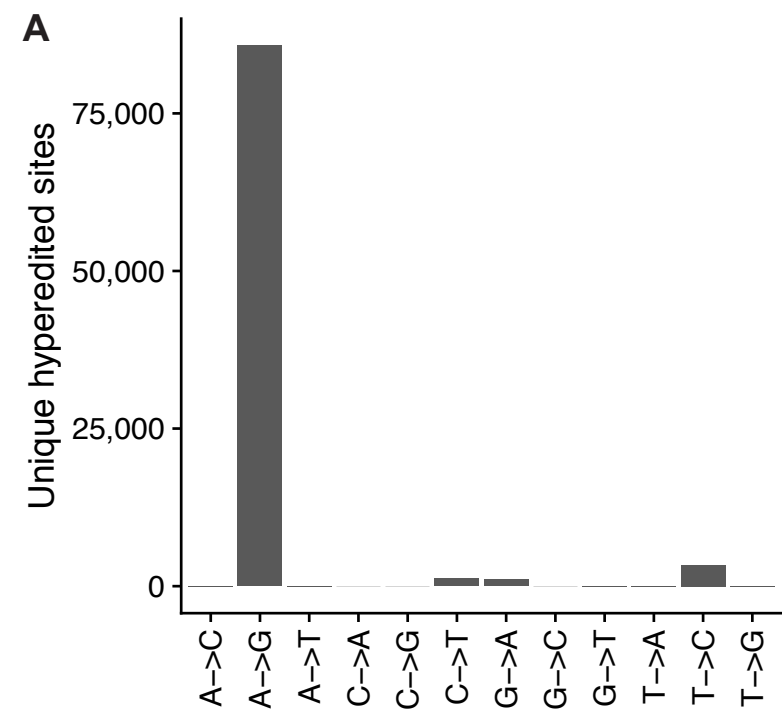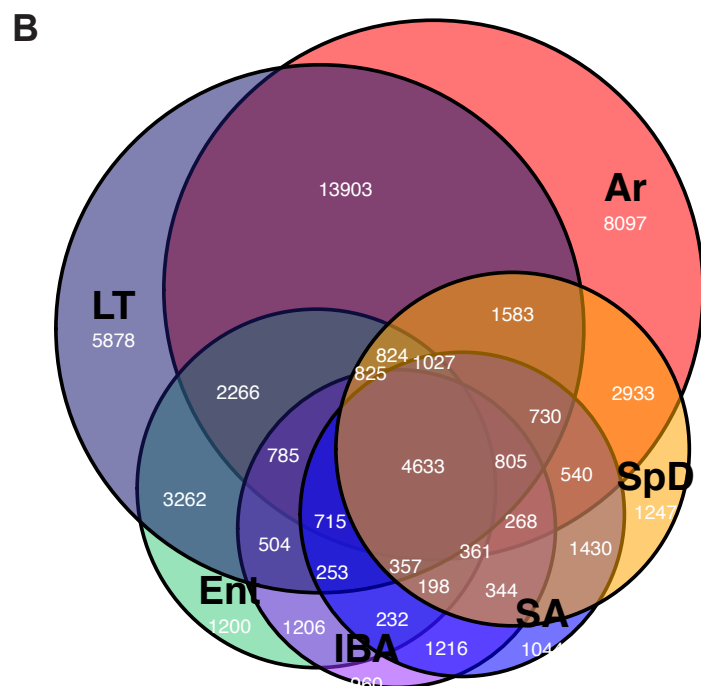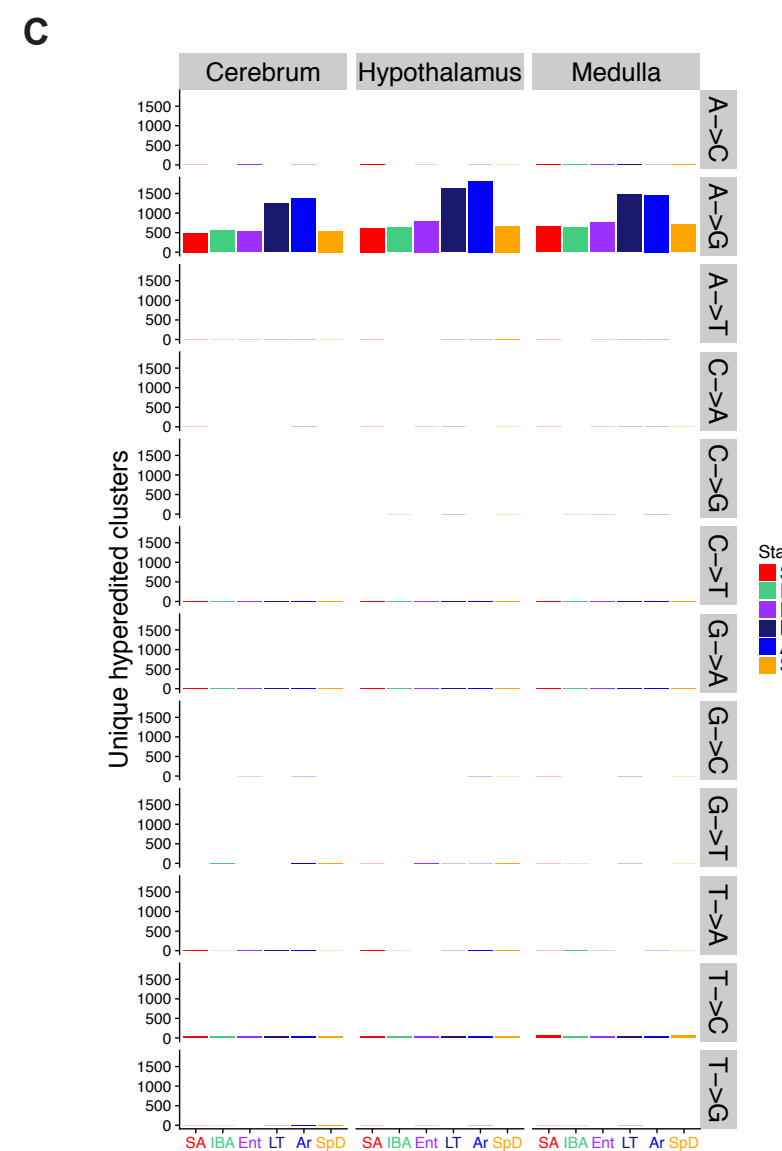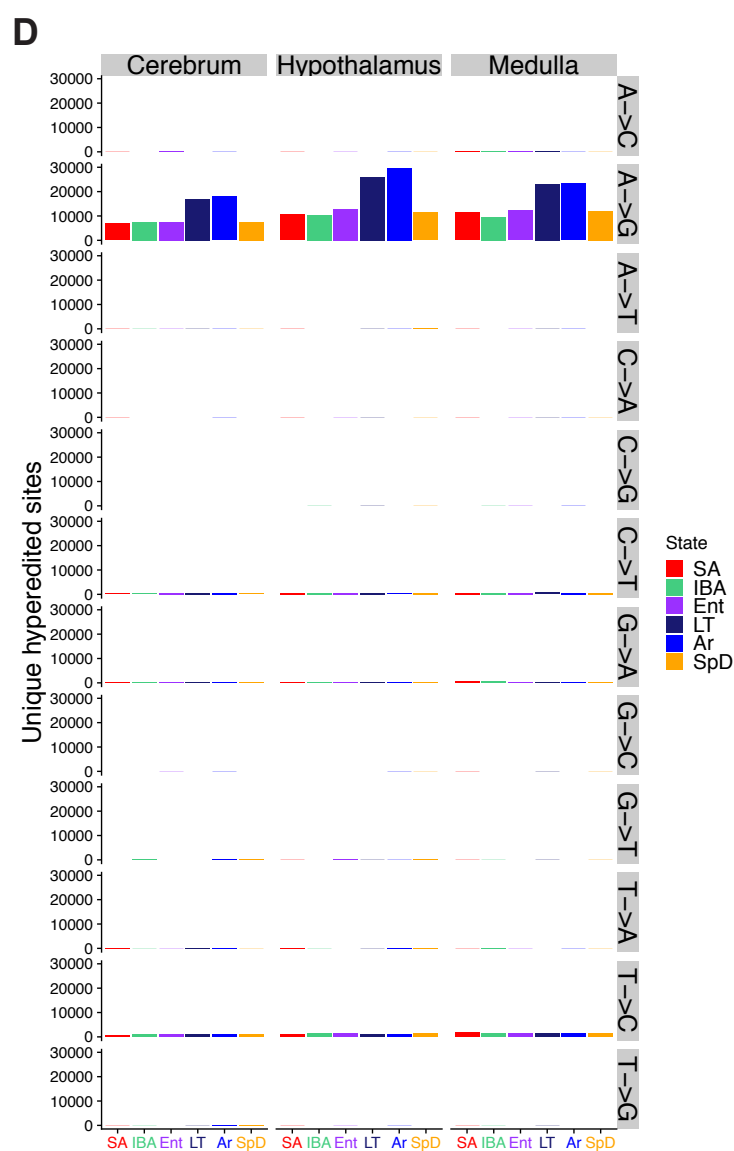

**Supplemental Figure 10**

**A**

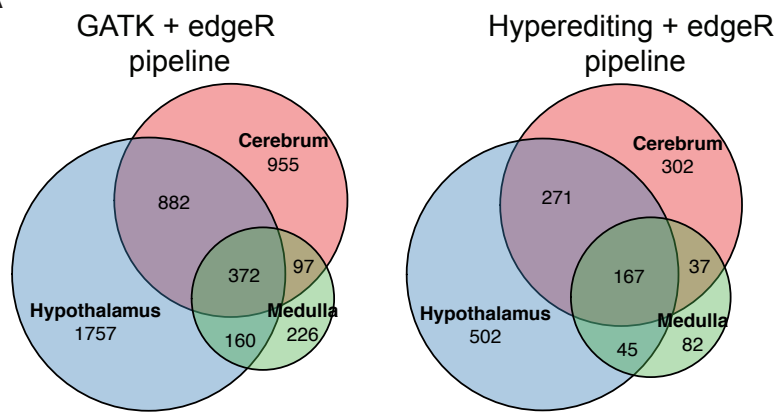

**B**

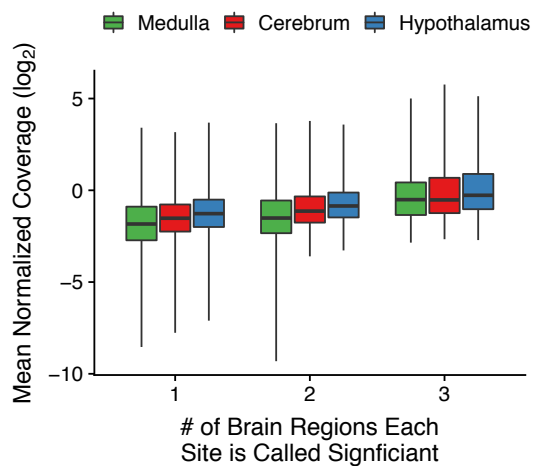

**C**

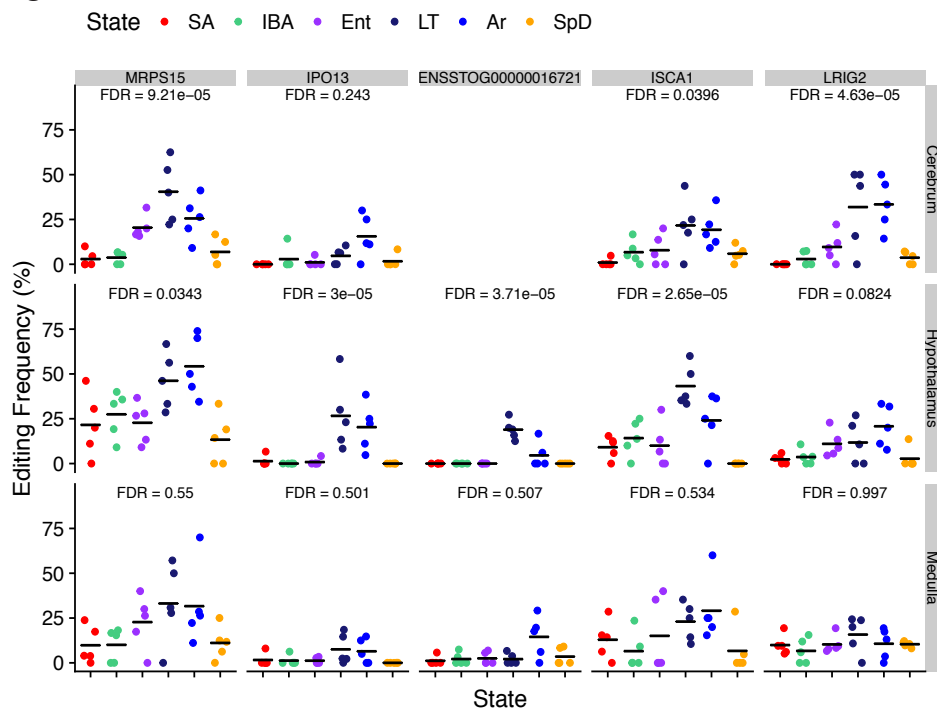

**D**

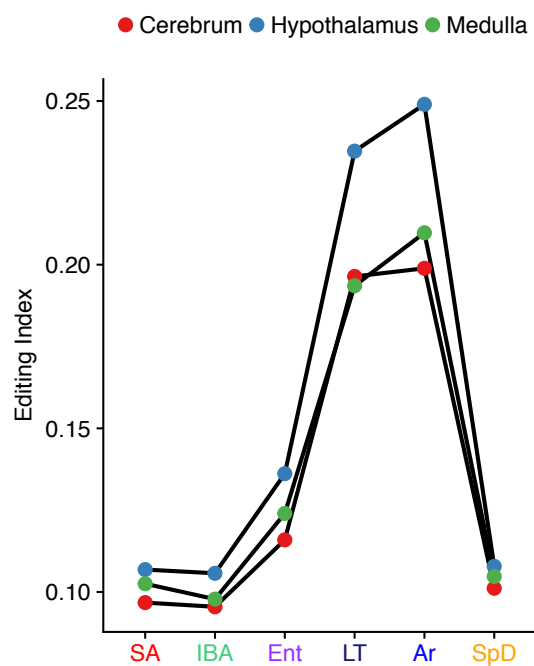

# Supplemental Figure 11

**A**

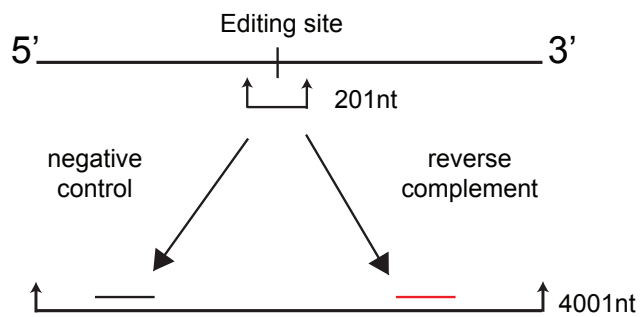

Reverse complement  
flanking sequencing  
and align to 4001nt region

Require an alignment with an  
e-value < 0.01 that spans the editing site  
at least 20 nucleotides in length

As a control also align  
non-reverse complemented flanking  
region and examine second  
best alignments

**B**

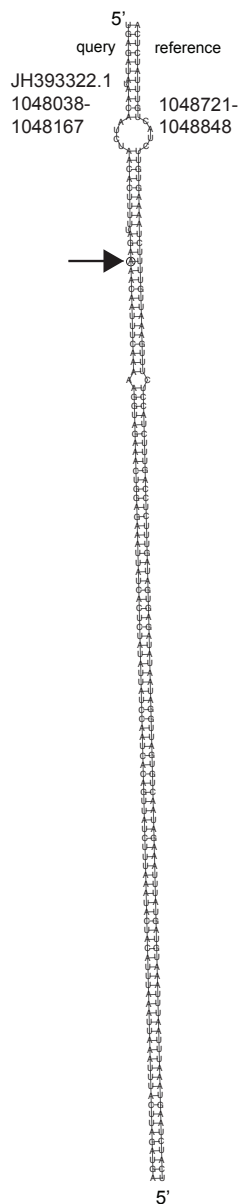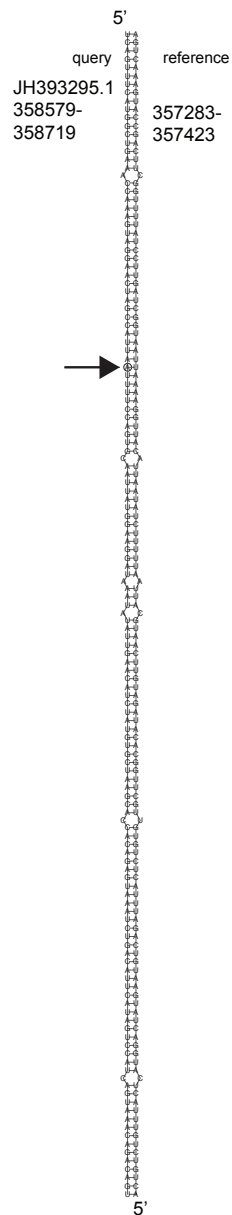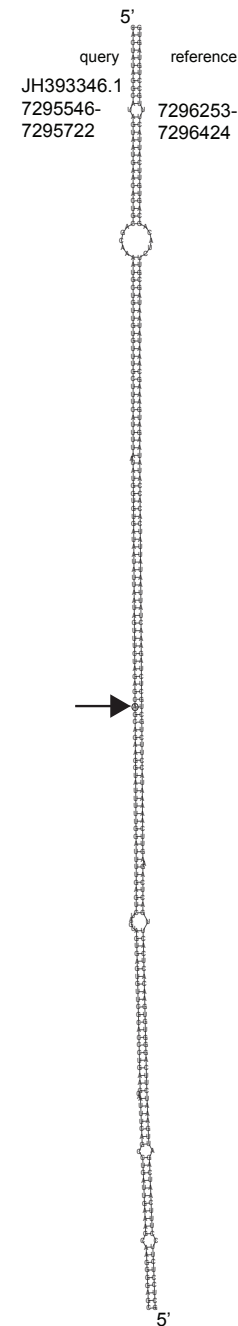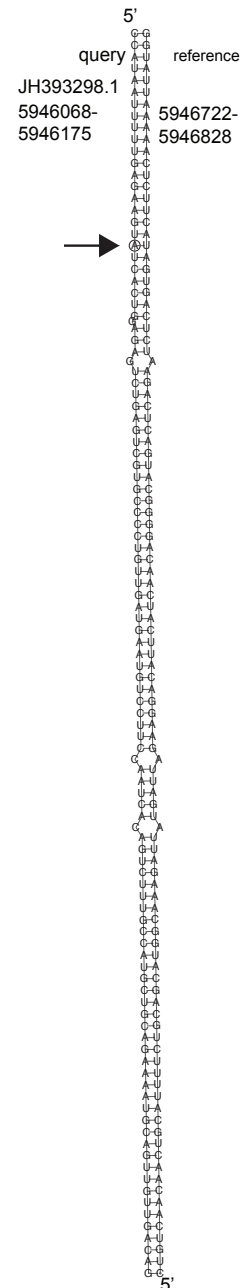

# Supplemental Figure 12

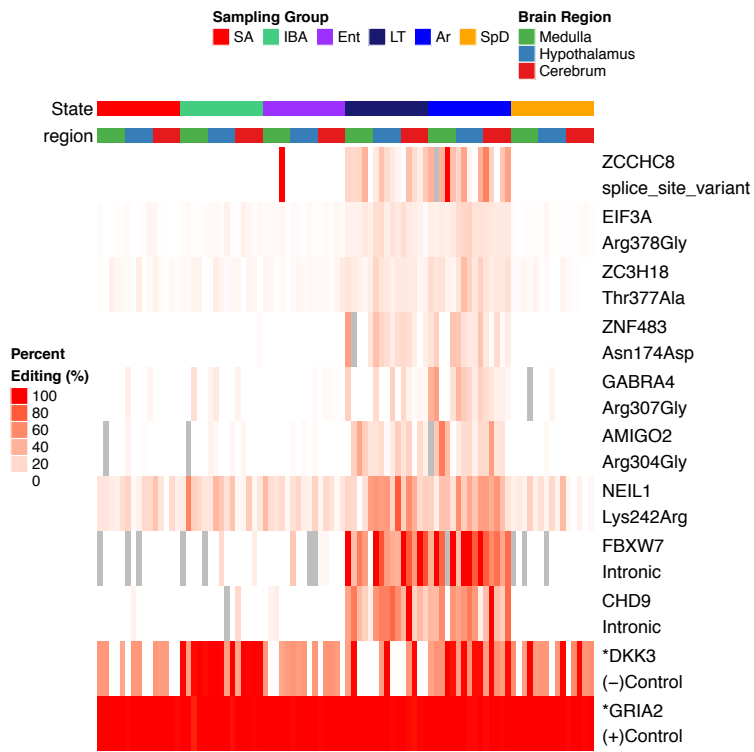



# Supplemental Figure 13

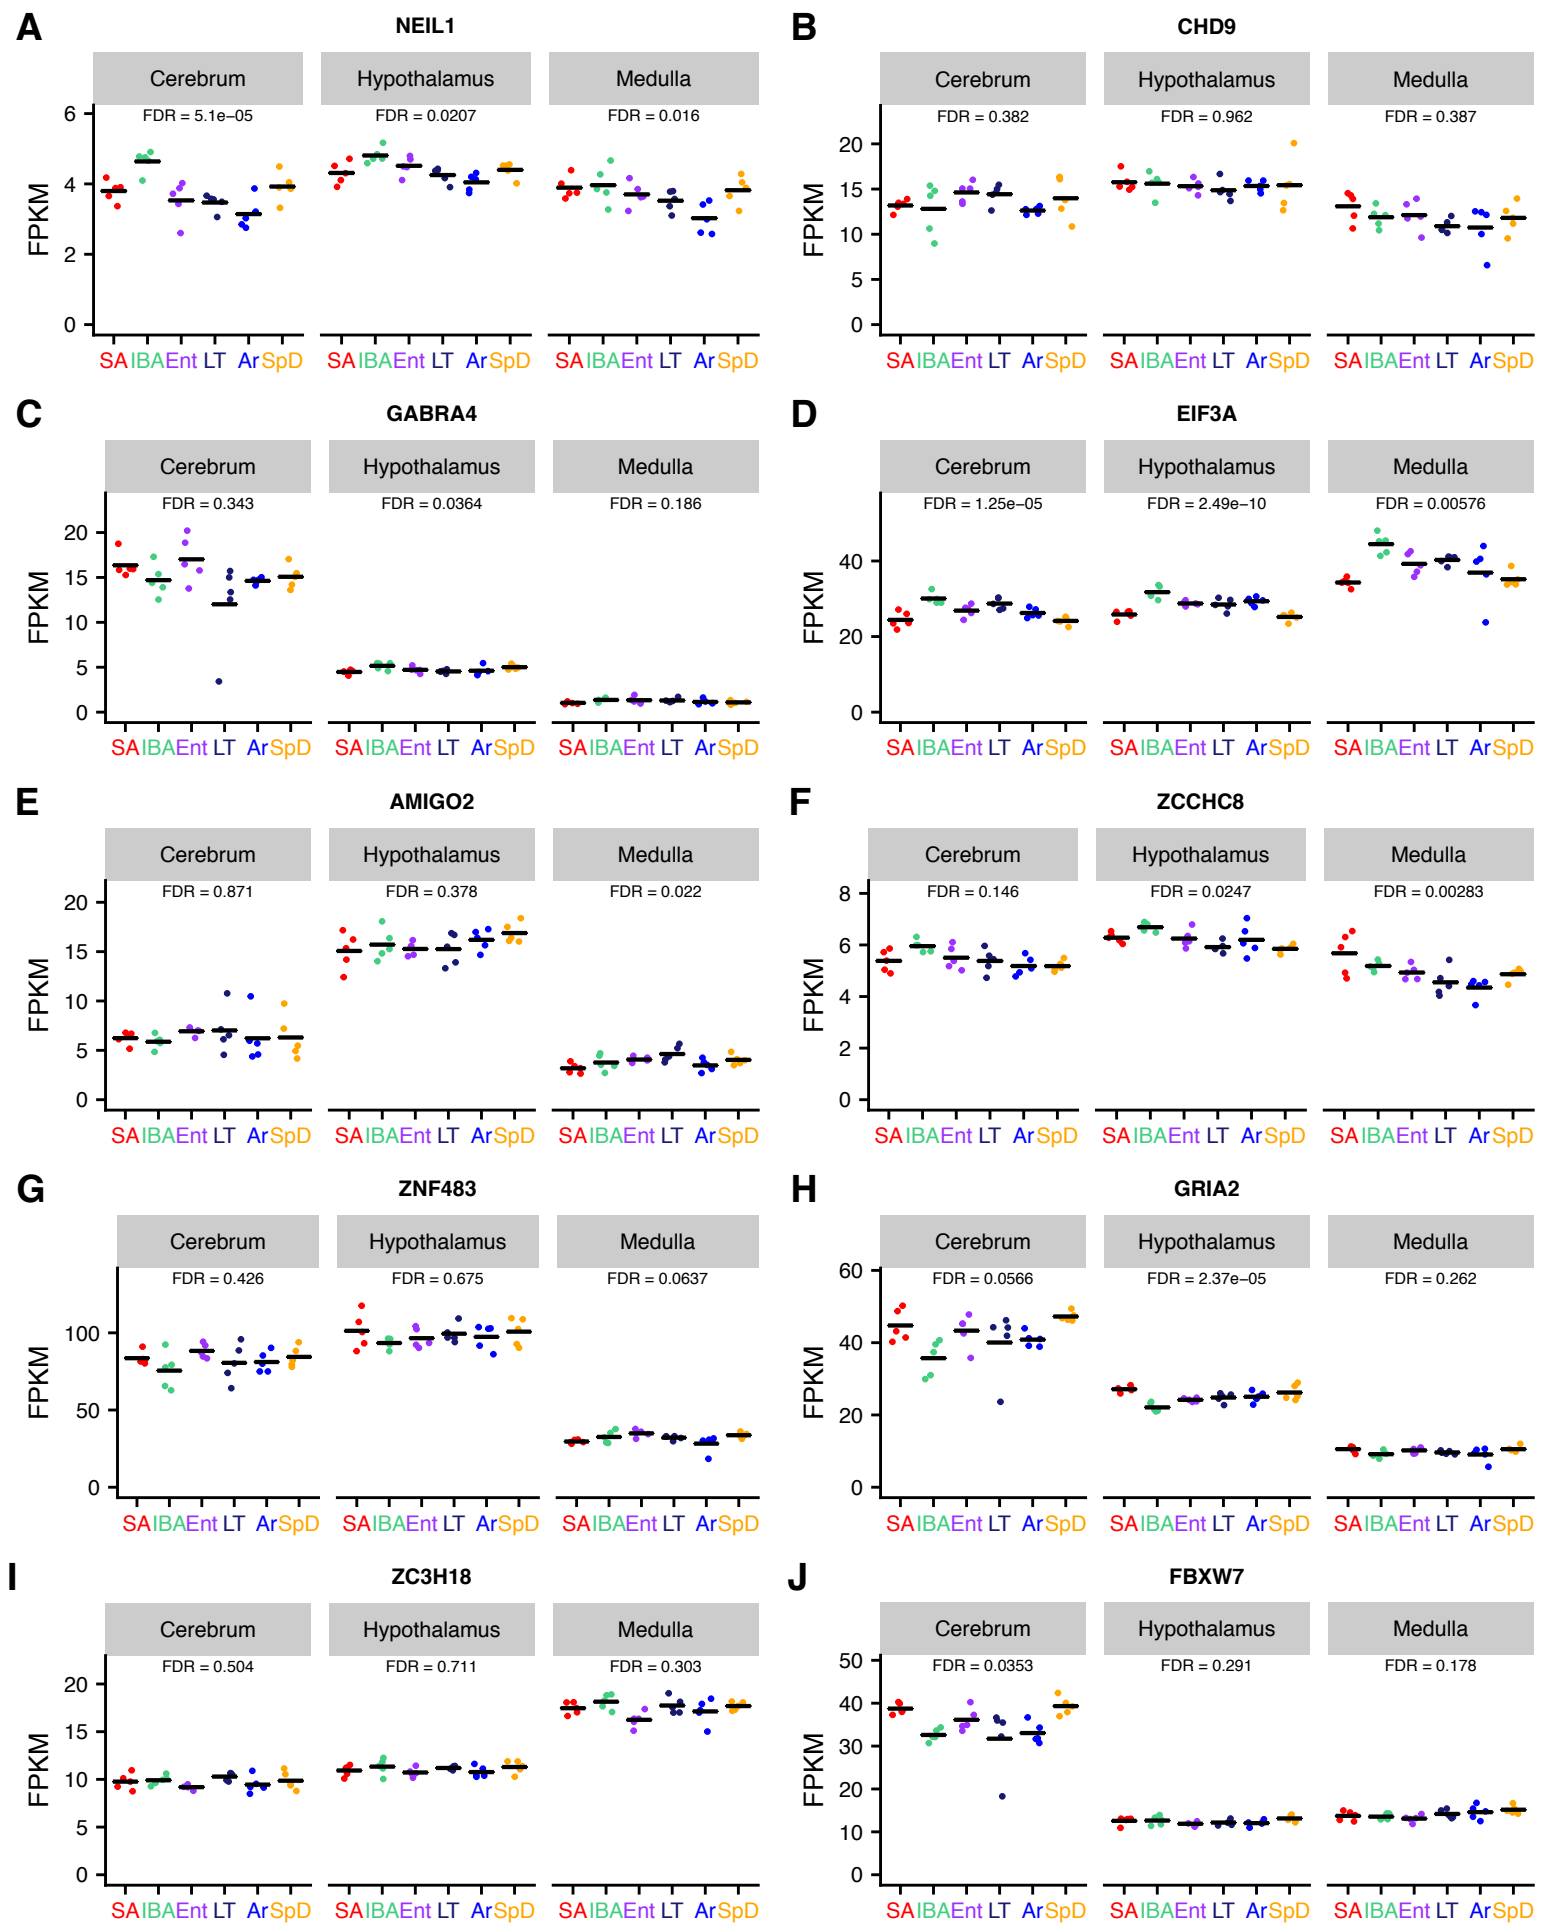

Supplemental Figure 14

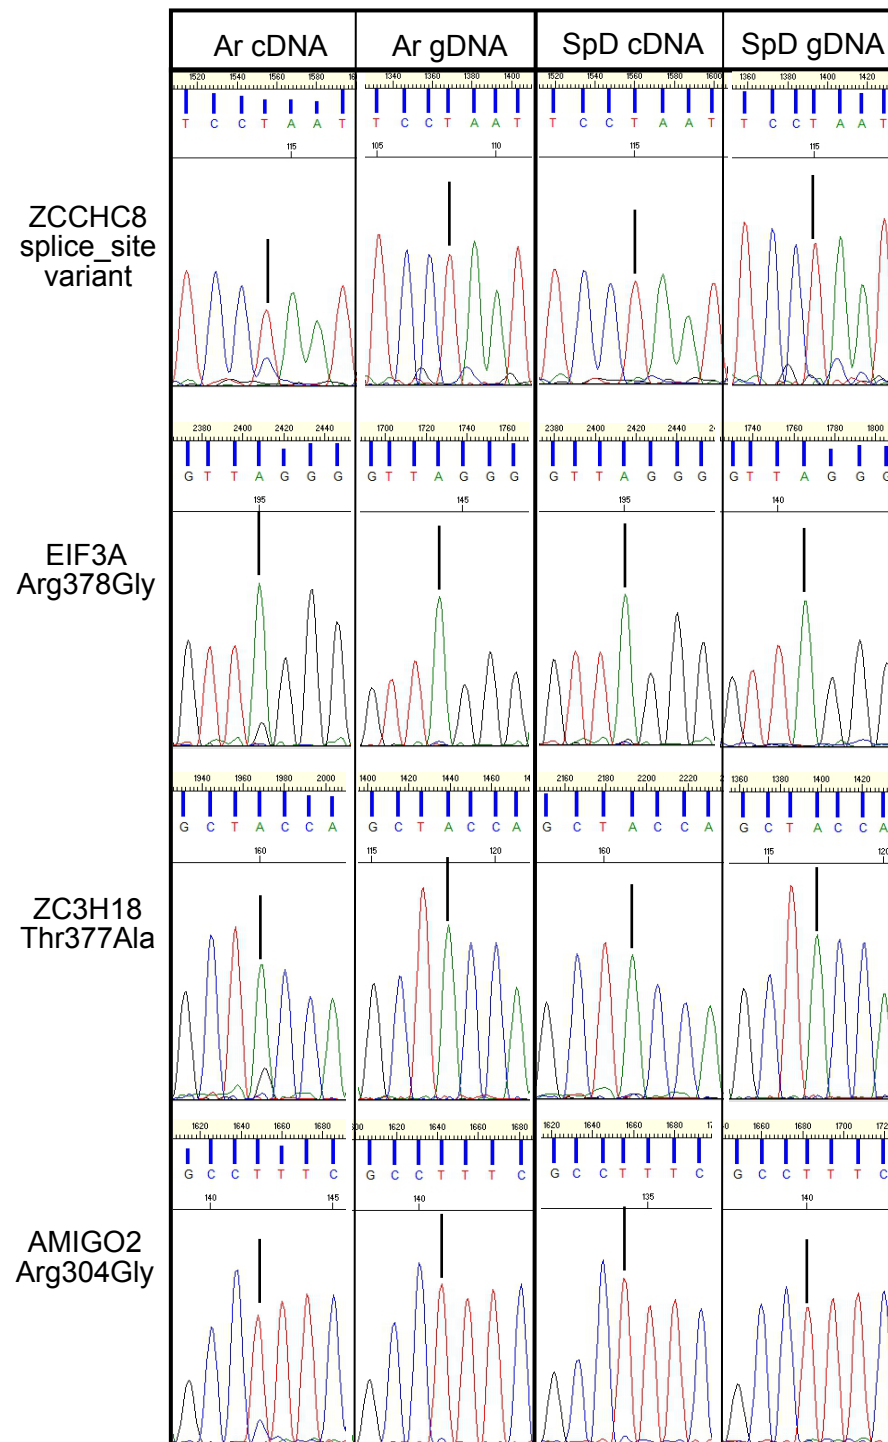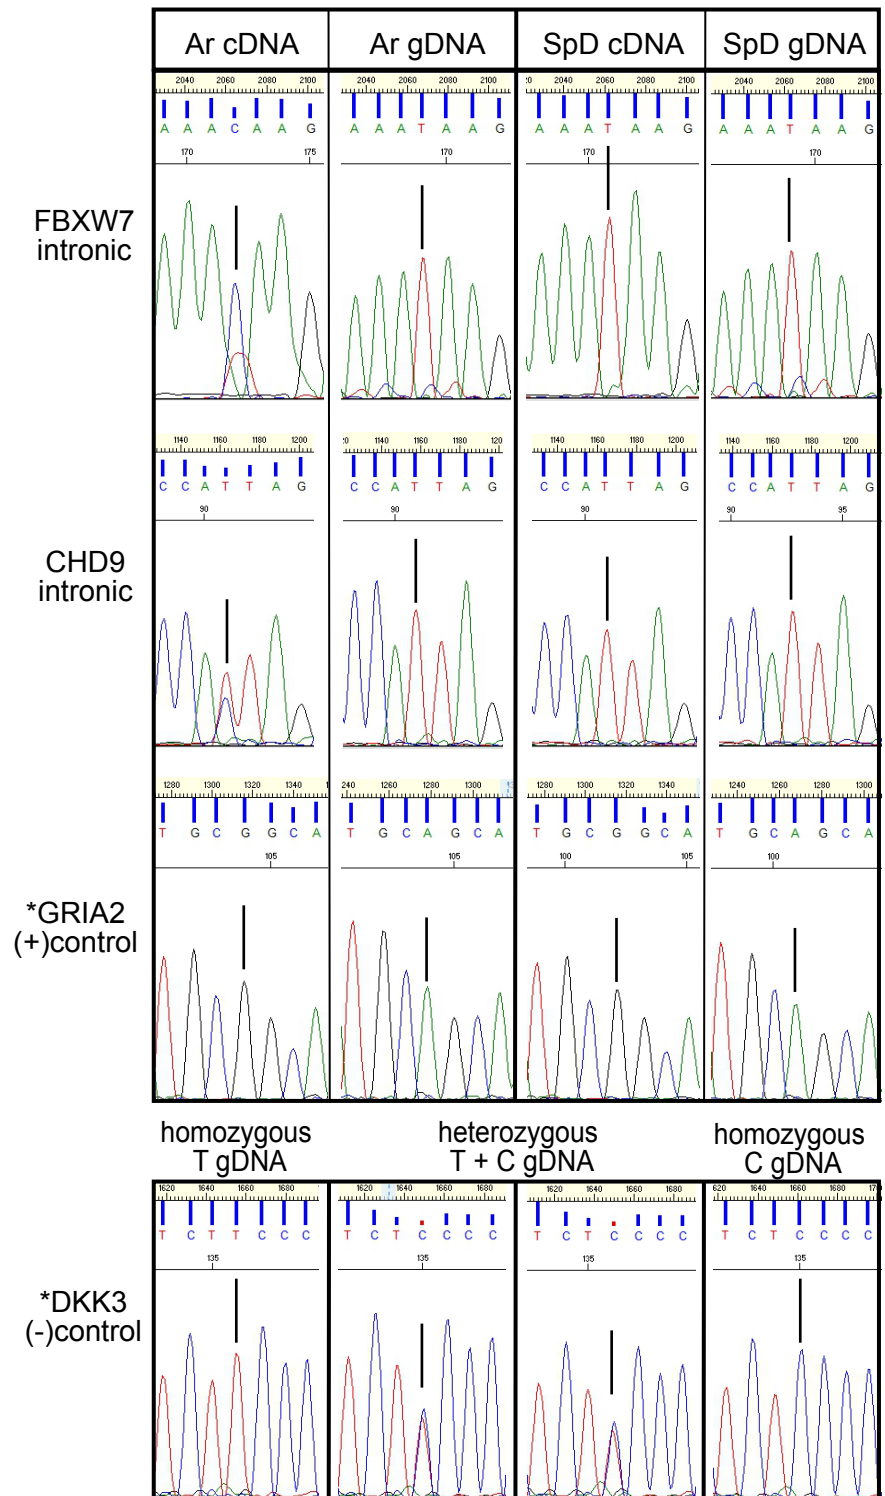

# Supplemental Figure 15

## A

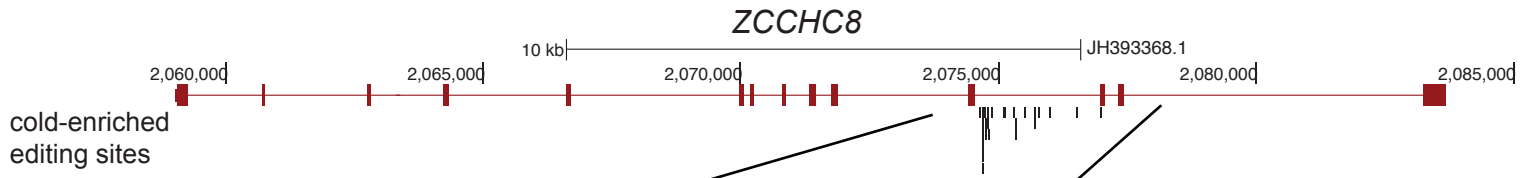

## B

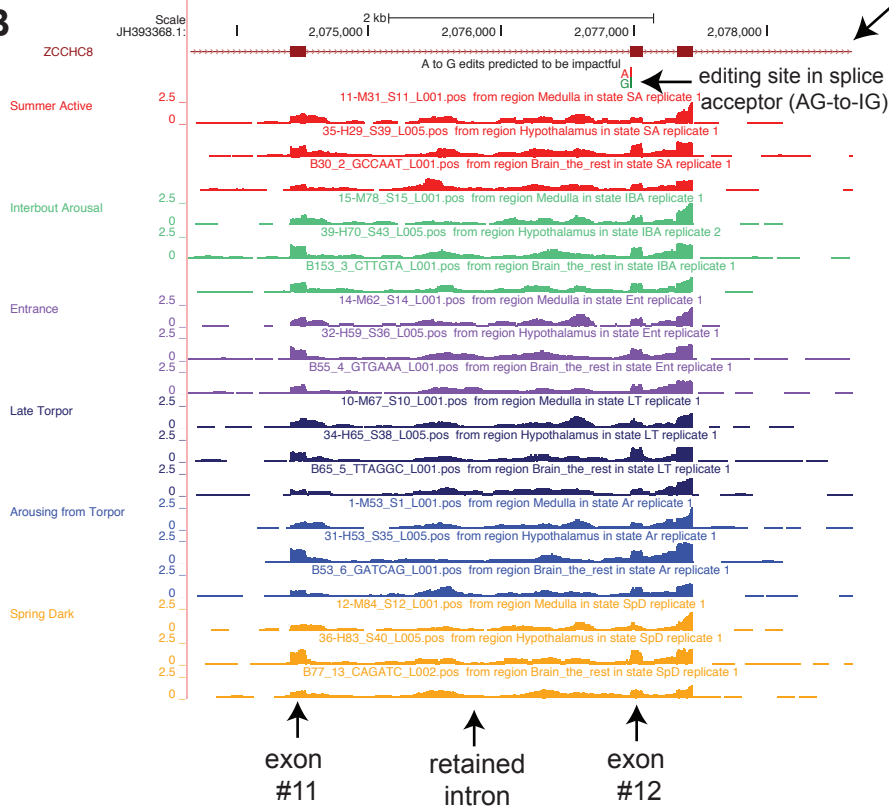

## C

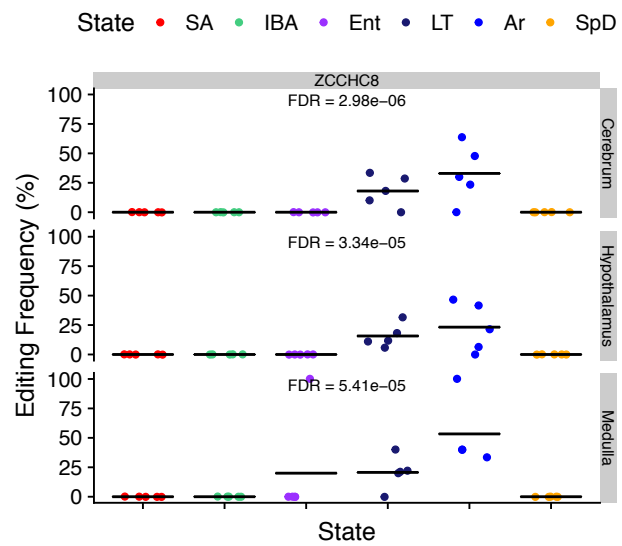

## D

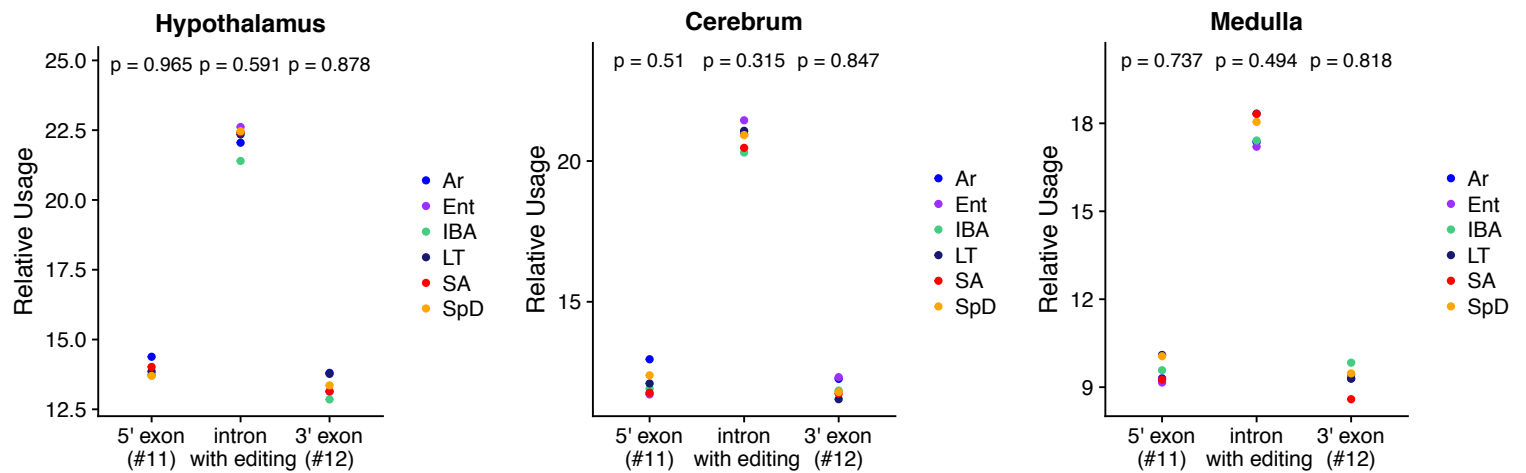

Supplemental Figure 16

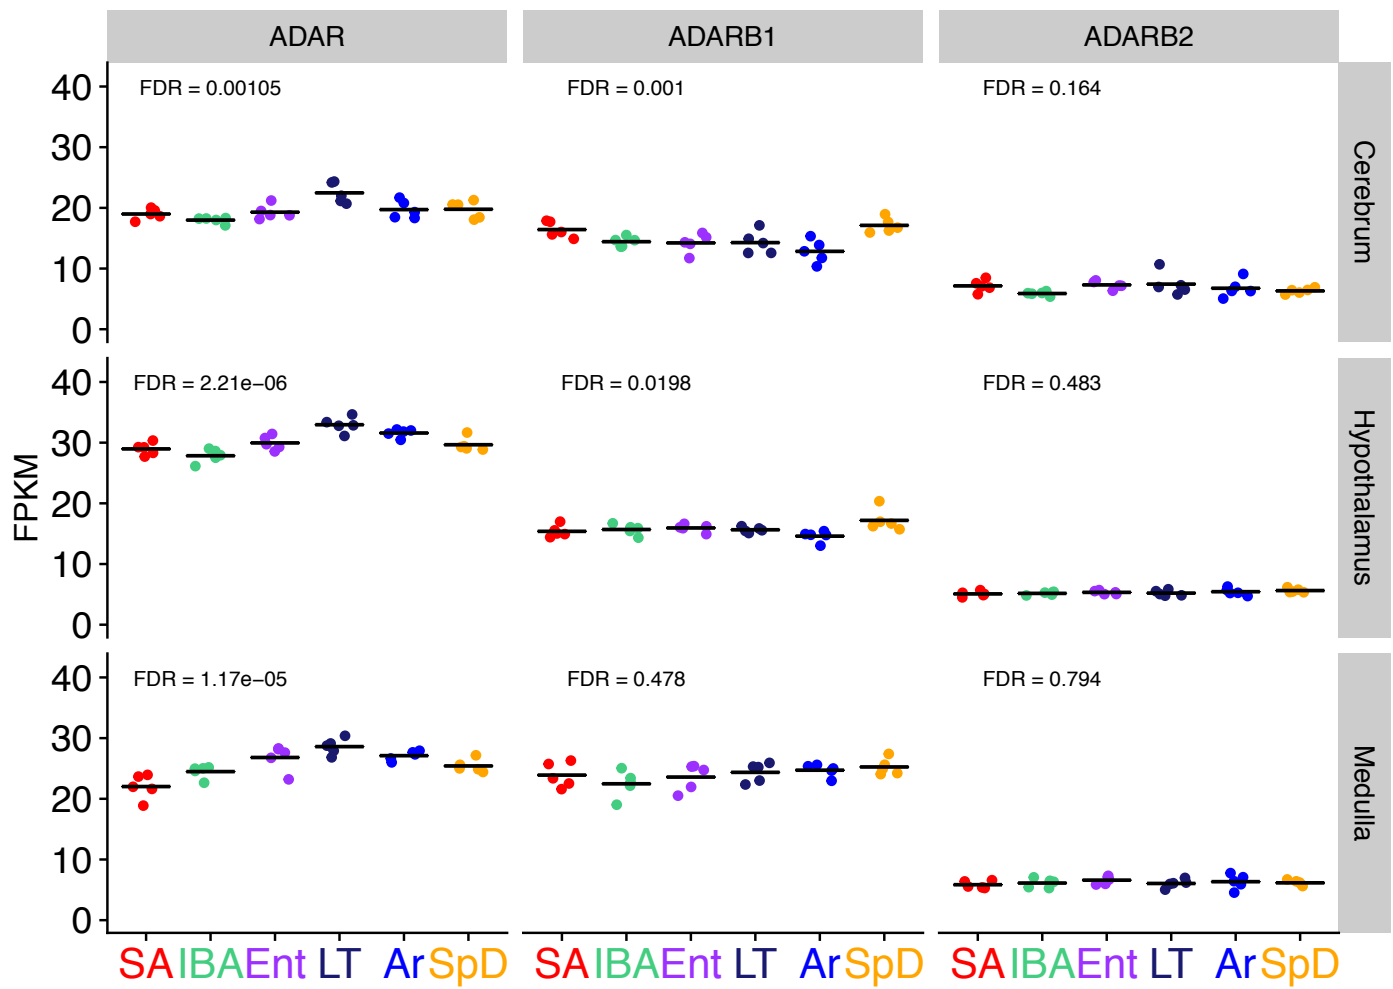

Supplemental Figure 17

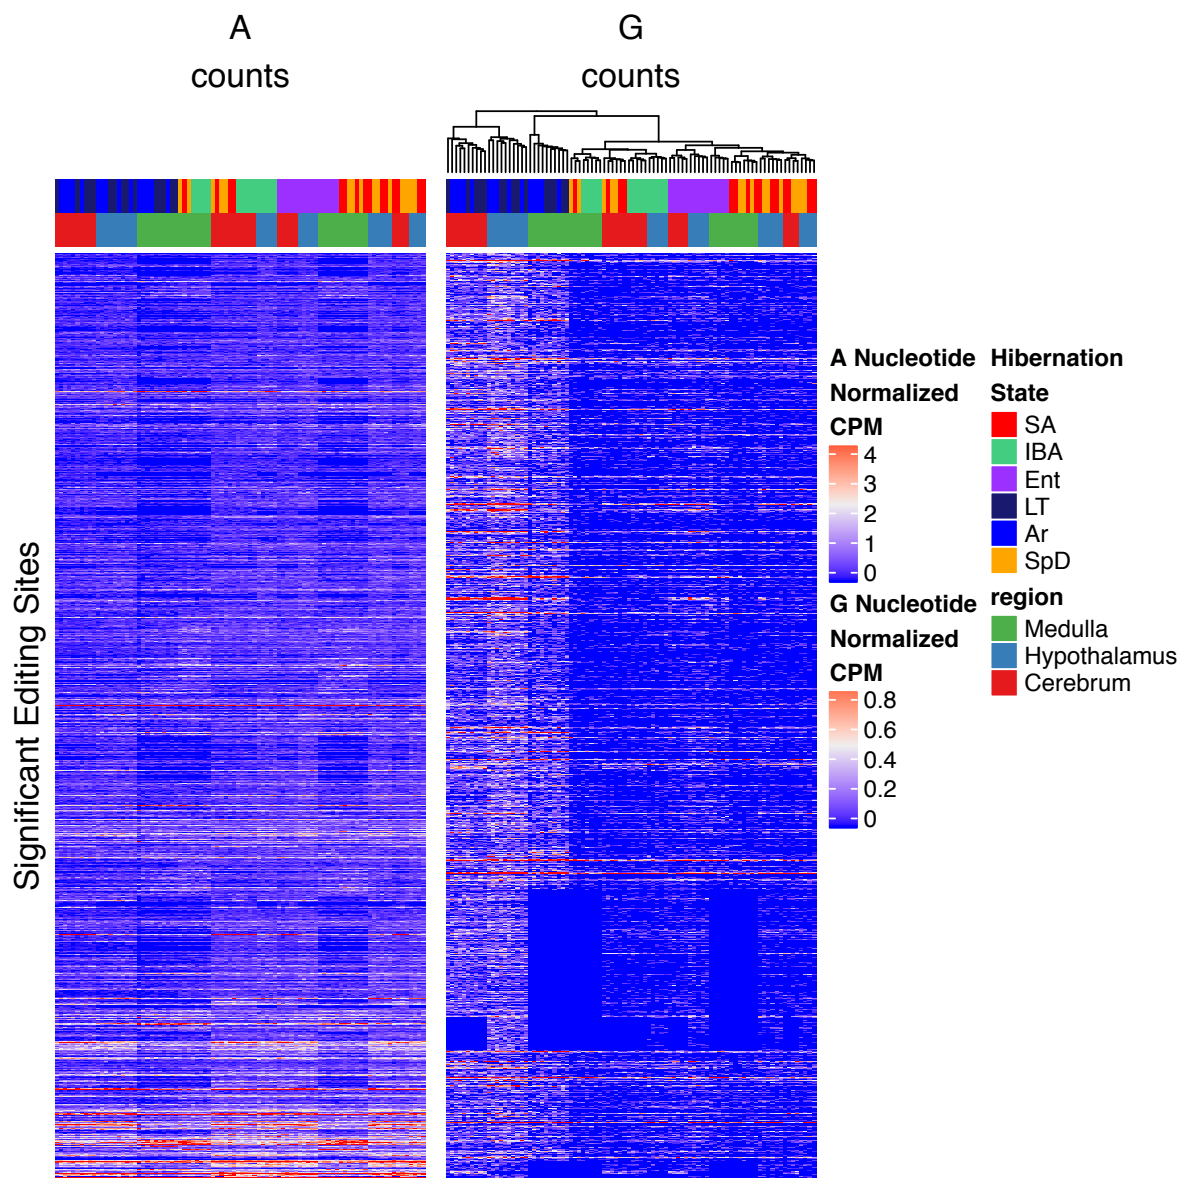

Supplement: supp_066522.118_Supplemental_Figures.pdf [file supp_066522.118_Supplemental_Figures.pdf]
